# Supplementary material
Source: ML conference proceedings conference paper supplement (https://openreview.net/forum?id=SnIK1W2Fue)
Supplement: supplementary_material [file Interface_subjective_evaluation.pdf › ICLR_supp/Interface_subjective_evaluation.pdf]

# Human preference investigation

Welcome to this image quality evaluation study. The goal of this experiment is to collect your subjective ratings of AI-generated images across multiple quality dimensions. Please use the slider bars (ranging from 1 to 10) to rate each image based on the following four dimensions:

- **Structural Faithfulness (SF)** : Does the image exhibit realistic and coherent spatial structure and composition?
- **Aesthetic Appeal (AA)** : How visually pleasing is the image in terms of style, color, and overall design?
- **Fine-grained Detail (FD)** : Does the image contain clear, rich, and naturally rendered fine details?
- **Semantic Alignment (SA)**: How well does the image content align with the intended prompt or semantic meaning?
- **Prompt Responsiveness (PR)**: How accurately and completely does the image reflect the specific content or instructions described in the prompt?

After you complete the ratings for all five dimensions, the system will automatically calculate and display the overall average score for the image. Please provide thoughtful and honest evaluations to ensure the reliability of the collected data. Thank you for your participation!

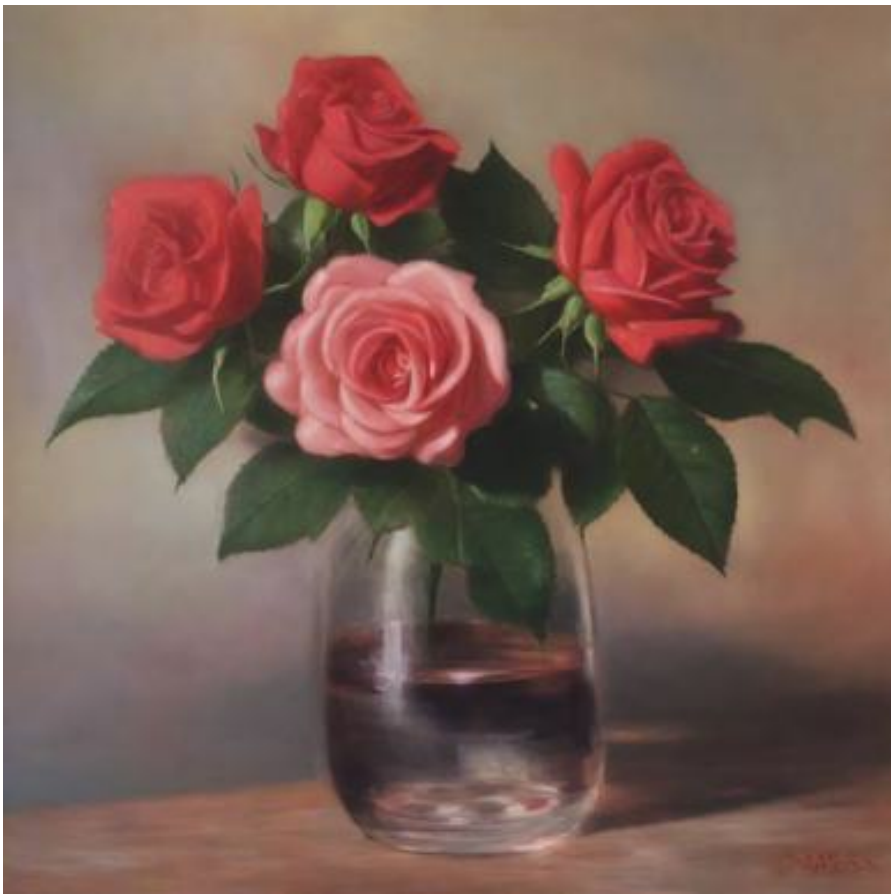

Prompt : Four roses

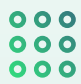

**Structural Faithfulness**

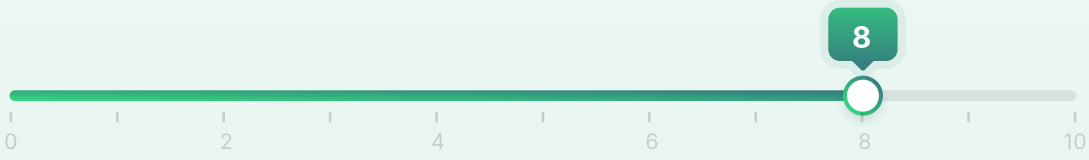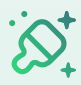

**Aesthetic Appeal**

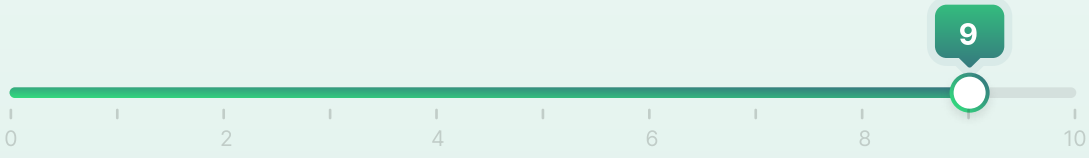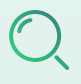

**Fine-grained Detail**

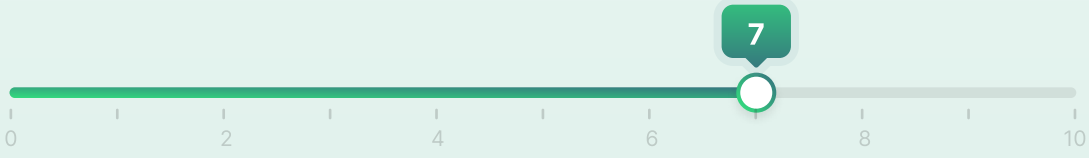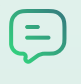

**Semantic Alignment**

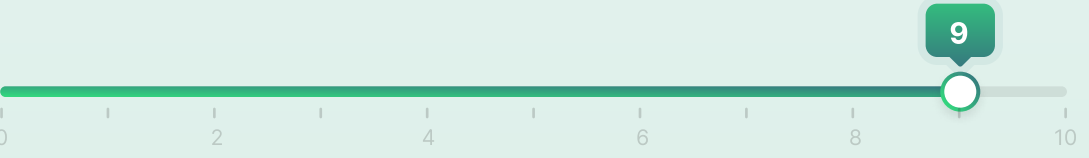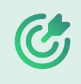

**Prompt Responsiveness**

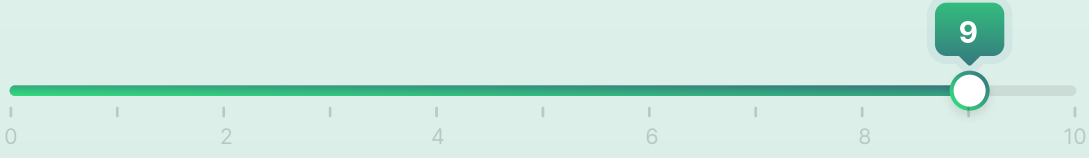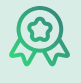

**Overall Score**

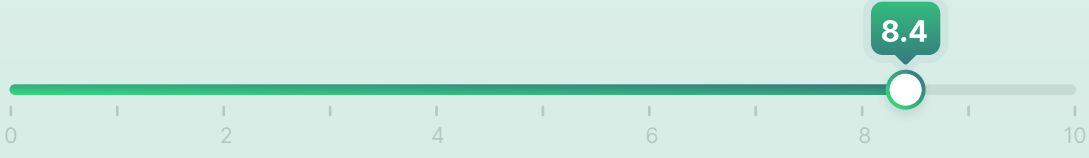

Previous

Next
